# Supplementary material for: A no-hysteresis TIPS–pentacene:polystyrene blend-based organic field effect transistor by extruded direct ink writing and the application in a resistive load inverter circuit
Source: Royal Society of Chemistry journal article supplement (doi:10.1039/d2tc00948j), 2022-01-01
Supplement: d2tc00948j1.pdf [file d2tc00948j1.pdf]

## Supporting Information

### **No hysteresis TIPS-pentacene:polystyrene Blend-based Organic Field Effect Transistor by Extruded Direct Ink Writing and the Application in Resistive Load Inverter Circuit**

Huiwen Bai<sup>a</sup>, Yi Yang<sup>a</sup>, Richard M Voyles<sup>a</sup>, Robert A Nawrocki<sup>a</sup>

<sup>a</sup>School of Engineering Technology Purdue University, West Lafayette IN 47907, USA. Email: robertnawrocki@purdue.edu

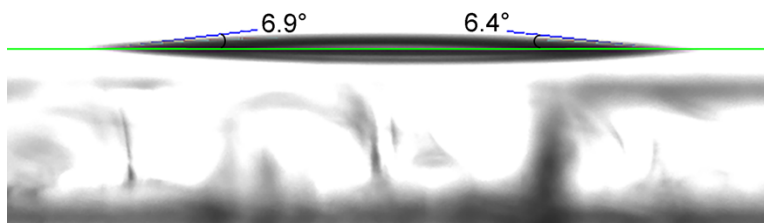

Fig. S-1 Toluene contact angles on Parylene dix-SR surface.

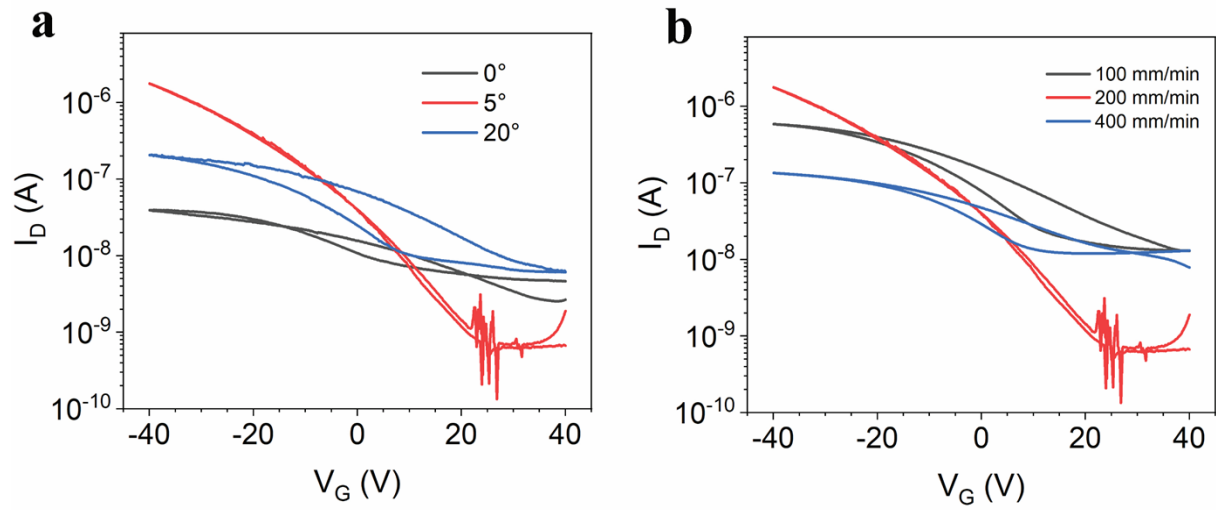

Fig. S-2 The transfer curves of OFETs with (a) different tilted substrates and (b) different printing speeds.

Table S-1. The electrical performance of OFET with different OSC deposition techniques including our work and previous studies.

| Technique                                | Threshold voltage (V) | Maximum Mobility ( $\text{cm}^2 \text{V}^{-1} \text{s}^{-1}$ ) | $I_{\text{ON}}/I_{\text{OFF}}$ | Ref.      |
|------------------------------------------|-----------------------|----------------------------------------------------------------|--------------------------------|-----------|
| Spun-cast                                | -10                   | 0.40                                                           | $6.0 \times 10^6$              | 1         |
| Inkjet-printed                           | -20.40                | 0.064                                                          | $2.80 \times 10^4$             | 2         |
| Ultrasonically-based printed             | -                     | 0.142                                                          | -                              | 3         |
| Spray-coated                             | -5.2                  | 0.22                                                           | $3.32 \times 10^4$             | 4         |
| Blade coated                             | -8.59                 | 1.74                                                           | $1.45 \times 10^9$             | 5         |
| Drop-casted                              | 21.86                 | 1.00                                                           | $3.30 \times 10^3$             | This work |
| Motor-controlled Extrusion-based printed | 1.46                  | 0.14                                                           | $2.70 \times 10^3$             | This work |

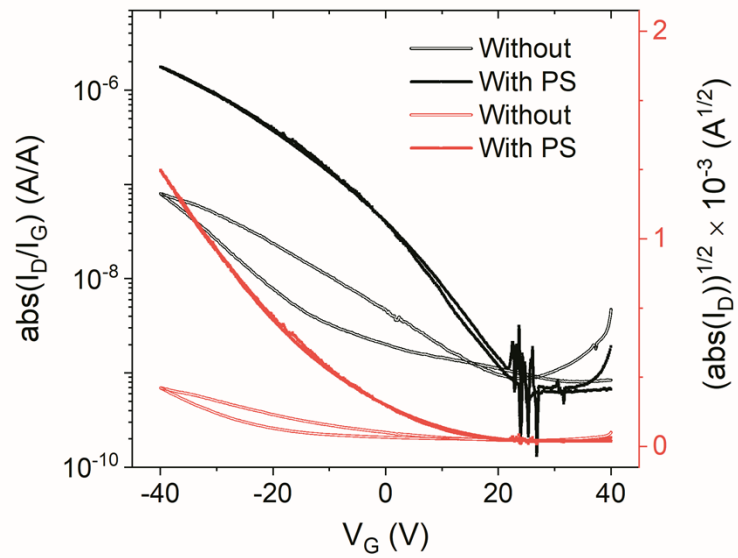

Fig. S-3 The transfer curves of OFETs with and without PS as an active layer.

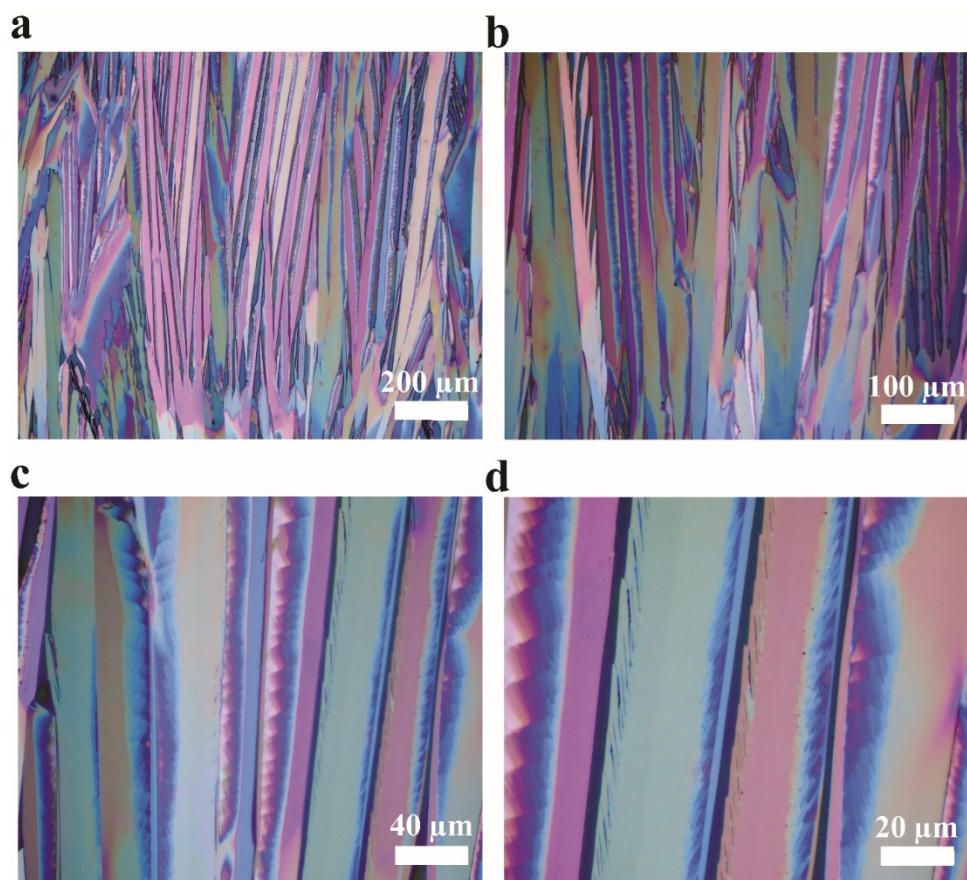

Fig. S-4 Polarized (75 degrees) optical microscope images of TIPS-pentacene:PS blend films with 25 °C in-situ annealing temperature (a) 200  $\mu\text{m}$  (b) 100  $\mu\text{m}$  (c) 40  $\mu\text{m}$  (d) 20  $\mu\text{m}$ .

1. H. Zajackowska, L. Veith, W. Waliszewski, M. A. Bartkiewicz, M. Borkowski, P. Sleczkowski, J. Ulanski, B. Graczykowski, P. W. M. Blom, W. Pisula and T. Marszalek, *ACS Appl. Mater. Interfaces*, 2021, **13**, 59012-59022.
2. M.-B. Madec, P. J. Smith, A. Malandraki, N. Wang, J. G. Korvink and S. G. Yeates, *J. Mater. Chem.*, 2010, **20**.
3. S. Chen, X. Ma, Z. Cai, H. Long, X. Wang, Z. Li, Z. Qu, F. Zhang, Y. Qiao and Y. Song, *Adv. Mater.*, 2022, **34**, e2200928.
4. S. Grammatikos, T. Kaimakamis, S. Panos, C. Gravalidis, A. Laskarakis and S. Logothetidis, *Mater. Today: Proc.*, 2021, **37**, A1-A7.
5. K. Kim, K. Nam, X. Li, D. Y. Lee and S. H. Kim, *ACS Appl. Mater. Interfaces*, 2019, **11**, 42403-42411.
